# Supplementary material for: Gardnerella species exhibit synergy in their ability to displace Lactobacillus crispatus adhered to HeLa cells
Source: PeerJ. 2025 Nov 5;13:e20076. doi: 10.7717/peerj.20076 (PMC12595946; doi:10.7717/peerj.20076)
Supplement: Supplemental Information 1 [file peerj-13-20076-s001.xlsx]

## Sheet: Sheet1
ITEM TO CHECK	IMPORTANCE	CHECKLIST
EXPERIMENTAL DESIGN
Definition of experimental and control groups	E	108-116
Number within each group	E	108-116
Assay carried out by core lab or investigator's lab?	D
Acknowledgement of authors' contributions	D
SAMPLE
Description	E	108-116
Volume/mass of sample processed	D
Microdissection or macrodissection	E	108-116
Processing procedure	E	130-131
If frozen - how and how quickly?	E	131
If fixed - with what, how quickly?	E	Not fixed
Sample storage conditions and duration (especially for FFPE samples)	E	131
NUCLEIC ACID EXTRACTION
Procedure and/or instrumentation	E	135-138
Name of kit and details of any modifications	E	135-138
Source of additional reagents used	D
Details of DNase or RNAse treatment	E	138
Contamination assessment (DNA or RNA)	E	N/A
Nucleic acid quantification	E	138-139
Instrument and method	E	139
Purity (A260/A280)	D
Yield	D
RNA integrity method/instrument	E	N/A
RIN/RQI or Cq of 3' and 5' transcripts	E	N/A
Electrophoresis traces	D	N/A
Inhibition testing (Cq dilutions, spike or other)	E	174-177
REVERSE TRANSCRIPTION
Complete reaction conditions	E	N/A
Amount of RNA and reaction volume	E	N/A
Priming oligonucleotide (if using GSP) and concentration	E	N/A
Reverse transcriptase and concentration	E	N/A
Temperature and time	E	N/A
Manufacturer of reagents and catalogue numbers	D	N/A
Cqs with and without RT	D*	N/A
Storage conditions of cDNA	D	N/A
qPCR TARGET INFORMATION
If multiplex, efficiency and LOD of each assay.	E	No
Sequence accession number	E	158-161
Location of amplicon	D
Amplicon length	E	164 -Table 1
In silico specificity screen (BLAST, etc)	E	167
Pseudogenes, retropseudogenes or other homologs?	D
Sequence alignment	D
Secondary structure analysis of amplicon	D
Location of each primer by exon or intron (if applicable)	E	N/A
What splice variants are targeted?	E	N/A
qPCR OLIGONUCLEOTIDES
Primer sequences	E	164 -Table 1
RTPrimerDB Identification Number	D
Probe sequences	D**
Location and identity of any modifications	E	164 -Table 1
Manufacturer of oligonucleotides	D
Purification method	D
qPCR PROTOCOL
Complete reaction conditions	E	140-145
Reaction volume and amount of cDNA/DNA	E	144-145
Primer, (probe), Mg++ and dNTP concentrations	E	143-144
Polymerase identity and concentration	E	144
Buffer/kit identity and manufacturer	E	144
Exact chemical constitution of the buffer	D
Additives (SYBR Green I, DMSO, etc.)	E	144
Manufacturer of plates/tubes and catalog number	D
Complete thermocycling parameters	E	141-142
Reaction setup (manual/robotic)	D
Manufacturer of qPCR instrument	E	141
qPCR VALIDATION
Evidence of optimisation (from gradients)	D
Specificity (gel, sequence, melt, or digest)	E	169-171
For SYBR Green I, Cq of the NTC	E	N/A
Standard curves with slope and y-intercept	E	Figure 1
PCR efficiency calculated from slope	E	156
Confidence interval for PCR efficiency or standard error	D
r2 of standard curve	E	182
Linear dynamic range	E	150-152
Cq variation at lower limit	E	150-152
Confidence intervals throughout range	D
Evidence for limit of detection	E	167-169
If multiplex, efficiency and LOD of each assay.	E	No
DATA ANALYSIS
qPCR analysis program (source, version)	E	141
Cq method determination	E	145
Outlier identification and disposition	E	147
Results of NTCs	E	147
Justification of number and choice of reference genes	E	N/A
Description of normalisation method	E	147-154
Number and concordance of biological replicates	D
Number and stage (RT or qPCR) of technical replicates	E	162
Repeatability (intra-assay variation)	E	Figures 1, 2, 3, 4
Reproducibility (inter-assay variation, %CV)	D
Power analysis	D
Statistical methods for result significance	E	180-183
Software (source, version)	E	182
Cq or raw data submission using RDML	D
Table 1. MIQE checklist for authors, reviewers and editors. All essential information (E) must be submitted with the manuscript. Desirable
information (D) should be submitted if available. If using primers obtained from RTPrimerDB, information on qPCR target, oligonucleotides,
protocols and validation is available from that source.
*: Assessing the absence of DNA using a no RT assay is essential when first extracting RNA. Once the sample has been validated as
RDNA-free, inclusion of a no-RT control is desirable, but no longer essential.
**: Disclosure of the probe sequence is highly desirable and strongly encouraged. However, since not all commercial pre-designed assay
vendors provide this information, it cannot be an essential requirement. Use of such assays is advised against.
N/A for reverse transcriptase section since the assay is just real-time PCR assay and dealing with DNA samples
No - the assay is not multiplex
