# Supplementary material for: Gardnerella species exhibit synergy in their ability to displace Lactobacillus crispatus adhered to HeLa cells
Source: PeerJ. 2025 Nov 5;13:e20076. doi: 10.7717/peerj.20076 (PMC12595946; doi:10.7717/peerj.20076)
Supplement: Supplemental Information 3 — Values of cycle threshold of each sample used in this paper, for different primers (species). With those values we constructed the calibration curves and also the concentration of each species after the adhesion assays. The concentration values allowed us to statistically analyze the observed differences. [file peerj-13-20076-s003.xlsx]

## Sheet: Inhibitors presence test
Sample	Target	Dilution	Cq
Lc+Gv+Gl	Ec	1*	19.21
Lc+Gv+Gl	Ec	1*	19.33
Lc+Gv+Gl	Ec	1*	19.45
Lc+Gv+Gl	Ec	0.1	22.83
Lc+Gv+Gl	Ec	0.1	22.91
Lc+Gv+Gl	Ec	0.1	22.72
Lc+Gv+Gl	Ec	0.01	26.11
Lc+Gv+Gl	Ec	0.01	26.4
Lc+Gv+Gl	Ec	0.01	26.42
Lc+Gv+Gl	Ec	0.001	29.87
Lc+Gv+Gl	Ec	0.001	29.4
Lc+Gv+Gl	Ec	0.001	29.67
* the sample was already diluted 1:40.
							Eficiency of the reaction.

## Sheet: Gv UM121
Gardnerella vaginalis UM121 calibration curve Cycle threshold (Ct)									qPCR primer efficiency @ 60ºC
									Gv	0.85	1.85
Raw data
qPCR efficiency curves - run 1
	Curve 1	Target (Gv)	Ec			Average Ct - Gv	Average Ct -Ec	CtGv-CtEc	ΔCt		Gv concentration	ΔCt
	100000000	19.76	17.38		100000000	19.705	17.67	2.035	3.49699		100000000	3.49699
	100000000	19.65	17.96		10000000	22.33	18.04	4.29	14.0012		10000000	14.0012
	10000000	22.32	18.03		1000000	25.865	18.135	7.73	116.208		1000000	116.208
	10000000	22.34	18.05		100000	32.29	20.025	12.265	1891.74		100000	1891.74
	1000000	26.03	18.27
	1000000	25.7	18
	100000	32.31	20
	100000	32.27	20.05
qPCR efficiency curves - run 2
	Curve 1	Target (Gv)	Ec			Average Ct - Gv	Average Ct -Ec	CtGv-CtEc	ΔCt		Gv concentration	ΔCt
	100000000	21.59	20.36		100000000	21.51	20.31	1.2	2.09221		100000000	2.09221
	100000000	21.43	20.26		10000000	21.98	18.065	3.915	11.1167		10000000	11.1167
	10000000	21.99	18.04		1000000	26.02	17.195	8.825	227.924		1000000	227.924
	10000000	21.97	18.09		100000	28.895	18.01	10.885	809.402		100000	809.402
	1000000	26.19	17.23
	1000000	25.85	17.16
	100000	28.93	18
	100000	28.86	18.02
qPCR efficiency curves - run 3
	Curve 1	Target (Gv)	Ec			Average Ct - Gv	Average Ct -Ec	CtGv-CtEc	ΔCt		Gv concentration	ΔCt
	100000000	22.4	20.33		100000000	22.325	20.59	1.735	2.90766		100000000	2.90766
	100000000	22.25	20.85		10000000	25.565	20.42	5.145	23.6918		10000000	23.6918
	10000000	25.63	20.32		1000000	28.68	19.735	8.945	245.387		1000000	245.387
	10000000	25.5	20.52		100000	32.735	20.72	12.015	1622.07		100000	1622.07
	1000000	29.02	19.61
	1000000	28.34	19.86
	100000	32.74	20.64
	100000	32.73	20.8

## Sheet: Gp UGent 18.01
Gardnerella piotii Ugent 18.01 calibration curve Cycle threshold (Ct)									qPCR primer efficiency @ 60ºC
									Gp	0.75	1.75
Raw data
qPCR efficiency curves - run 1
NTC	Curve 1	Target (Gv)	Ec			Average Ct - Gp	Average Ct -Ec	CtGp-CtEc	ΔCt		Gp concentration	ΔCt
lj	100000000	19.82	17.85		100000000	19.905	17.735	2.17	3.36816		100000000	3.36816
na	100000000	19.99	17.62		10000000	23.06	18.1	4.96	16.0498		10000000	16.0498
Ec	10000000	23.1	18.06		1000000	26.55	18.17	8.38	108.808		1000000	108.808
31.17	10000000	23.02	18.14		100000	29.765	18.085	11.68	689.738		100000	689.738
	1000000	26.49	18.12		10000	34.765	19.33	15.435	5640.17		10000	5640.17
	1000000	26.61	18.22
	100000	30.15	18.13
	100000	29.38	18.04
	10000	34.32	19.35
	10000	35.21	19.31
qPCR efficiency curves - run 2
NTC	Curve 1	Target (Gv)	Ec			Average Ct - Gp	Average Ct -Ec	CtGp-CtEc	ΔCt		Gp concentration	ΔCt
lj	100000000	19.93	17.93		100000000	19.885	17.89	1.995	3.05394		100000000	3.05394
na	100000000	19.84	17.85		10000000	23.21	18.295	4.915	15.6506		10000000	15.6506
Ec	10000000	23.02	18.15		1000000	27.02	18.605	8.415	110.96		1000000	110.96
31.17	10000000	23.4	18.44		100000	30.24	18.395	11.845	756.46		100000	756.46
	1000000	26.93	18.67		10000	33.2	17.495	15.705	6560.13		10000	6560.13
	1000000	27.11	18.54
	100000	30.21	18.44
	100000	30.27	18.35
	10000	33.31	17.5
	10000	33.09	17.49
qPCR efficiency curves - run 3
NTC	Curve 1	Target (Gv)	Ec			Average Ct - Gp	Average Ct -Ec	CtGp-CtEc	ΔCt		Gp concentration	ΔCt
lj	100000000	22.84	20.21		100000000	22.88	20.29	2.59	4.26058		100000000	4.26058
na	100000000	22.92	20.37		10000000	25.53	20.495	5.035	16.7377		10000000	16.7377
Ec	10000000	25.07	20.5		1000000	29	20.125	8.875	143.537		1000000	143.537
31.17	10000000	25.99	20.49		100000	30.82	19.445	11.375	581.511		100000	581.511
	1000000	29.2	20.07		10000	32.415	16.32	16.095	8160.14		10000	8160.14
	1000000	28.8	20.18
	100000	30.69	19.33
	100000	30.95	19.56
	10000	32.05	16.34
	10000	32.78	16.3

## Sheet: Gl UGent 09.48
Gardnerella leopoldii Ugent 09.48 calibration curve Cycle threshold (Ct)									qPCR primer efficiency @ 60ºC
									Gl	0.85	1.85
Raw data
qPCR efficiency curves - run 1
	Curve 1	Target (Gl)	Ec			Average Ct - Gl	Average Ct -Ec	CtGl-CtEc	ΔCt		Gl concentration	ΔCt
	100000000	20.4	17.24		100000000	20.455	17.155	3.3	7.61494		100000000	7.61494
	100000000	20.51	17.07		10000000	24.095	17.605	6.49	54.1932		10000000	54.1932
	10000000	24.07	17.24		1000000	28.07	17.58	10.49	634.792		1000000	634.792
	10000000	24.12	17.97		100000	31.145	17.515	13.63	4380.77		100000	4380.77
	1000000	28.09	17.52
	1000000	28.05	17.64
	100000	31.22	17.51
	100000	31.07	17.52
qPCR efficiency curves - run 2
	Curve 1	Target (Gl)	Ec			Average Ct - Gl	Average Ct -Ec	CtGl-CtEc	ΔCt		Gl concentration	ΔCt
	100000000	19.78	17.88		100000000	19.805	17.92	1.885	3.18874		100000000	3.18874
	100000000	19.83	17.96		10000000	24.26	18.315	5.945	38.7557		10000000	38.7557
	10000000	24.38	18.16		1000000	28.125	18.75	9.375	319.694		1000000	319.694
	10000000	24.14	18.47		100000	31.485	18.96	12.525	2219.86		100000	2219.86
	1000000	28.09	18.78
	1000000	28.16	18.72
	100000	31.72	18.91
	100000	31.25	19.01
qPCR efficiency curves - run 3
	Curve 1	Target (Gl)	Ec			Average Ct - Gl	Average Ct -Ec	CtGl-CtEc	ΔCt		Gl concentration	ΔCt
	100000000	18.98	16.9		100000000	19.01	16.835	2.175	3.81152		100000000	3.81152
	100000000	18.95	16.77		10000000	22.3167	16.91	5.40667	27.8297		10000000	27.8297
	100000000	19.1	17.03		1000000	25.7867	16.56	9.22667	291.813		1000000	291.813
	10000000	22.46	16.99		100000	34.1933	18.39	15.8033	16680.3		100000	16680.3
	10000000	22.25	16.83
	10000000	22.24	16.91
	1000000	25.83	16.5
	1000000	25.74	16.62
	1000000	25.79	16.81
	100000	34.28	18.69
	100000	34.19	18.29
	100000	34.11	18.19

## Sheet: Gs CCUG 44005
Gardnerella swidsinskii CCUG 44005 calibration curve Cycle threshold (Ct)									qPCR primer efficiency @ 60ºC
									Gs	0.71	1.71
Raw data
qPCR efficiency curves - run 1
NTC	Curve 1	Target (Gs)	Ec			Average Ct - Gs	Average Ct -Ec	CtGs-CtEc	ΔCt		Gs concentration	ΔCt
lj	100000000	16.86	16.81		100000000	17.01	16.84	0.17	1.09549		100000000	1.09549
na	100000000	17.16	16.87		10000000	19.92	16.76	3.16	5.44838		10000000	5.44838
Ec	10000000	19.6	16.66		1000000	25.8	17.59	8.21	81.8273		1000000	81.8273
31.17	10000000	20.24	16.86		100000	28.43	17.44	10.99	363.603		100000	363.603
	1000000	25.82	17.54
	1000000	25.78	17.64
	100000	28.27	17.41
	100000	28.59	17.47
qPCR efficiency curves - run 2
NTC	Curve 1	Target (Gs)	Ec			Average Ct - Gs	Average Ct -Ec	CtGs-CtEc	ΔCt		Gs concentration	ΔCt
lj	100000000	20.85	19.77		100000000	20.64	20.07	0.57	1.35771		100000000	1.35771
na	100000000	20.43	20.37		10000000	24.31	20.42	3.89	8.06037		10000000	8.06037
Ec	10000000	24.27	20.39		1000000	28	20.04	7.96	71.5565		1000000	71.5565
31.17	10000000	24.35	20.45		100000	29.88	20.34	9.54	167.026		100000	167.026
	1000000	27.9	19.9
	1000000	28.1	20.18
	100000	29.59	20.29
	100000	30.17	20.39
qPCR efficiency curves - run 3
NTC	Curve 1	Target (Gs)	Ec			Average Ct - Gs	Average Ct -Ec	CtGs-CtEc	ΔCt		Gs concentration	ΔCt
lj	100000000	20.96	20.35		100000000	20.89	20.265	0.625	1.39837		100000000	1.39837
na	100000000	20.82	20.18		10000000	23.74	20.205	3.535	6.66256		10000000	6.66256
Ec	10000000	23.73	20.18		1000000	27.295	19.595	7.7	62.2401		1000000	62.2401
31.17	10000000	23.75	20.23		100000	29.61	19.875	9.735	185.446		100000	185.446
	1000000	27.1	19.56
	1000000	27.49	19.63
	100000	29.62	20.03
	100000	29.6	19.72
qPCR efficiency curves - run 5
NTC	Curve 1	Target (Gl)	Ec	16s		Average Ct - Fv	Average Ct -Ec	CtGl-CtEc	ΔCt		Lj concentration	ΔCt
lj	100000000	16.86	16.81		100000000	17.0867	16.9333	0.153333	1.08574		100000000	1.08574
na	100000000	17.16	16.87		10000000	19.93	16.7767	3.15333	5.42893		10000000	5.42893
Ec	100000000	17.24	17.12		100000	23.19	16.7367	6.45333	31.8861		100000	31.8861
31.17	10000000	19.6	16.66
	10000000	20.24	16.86
	10000000	19.95	16.81
	100000	22,74*	16.71
	100000	23.37	16.7
	100000	23.01	16.8

## Sheet: Lc CCUG 44128
Lactobacillus crispatus CCUG 44128 calibration curve Cycle threshold (Ct)									qPCR primer efficiency @ 60ºC
									Lc	0.85	1.85
Raw data
qPCR efficiency curves - run 1
	Curve 1	Target (Lc)	Ec			Average Ct - Lc	Average Ct -Ec	CtLc-CtEc	ΔCt		Lc concentration	ΔCt
	100000000	20.65	21.6		100000000	20.57	21.61	-1.04	0.512975		100000000	0.512975
	100000000	20.49	21.62		10000000	24.8833	21.0233	3.86	11.9121		10000000	11.9121
	100000000	21,72*	20,9*		1000000	28.0167	20.7467	7.27	106.301		1000000	106.301
	10000000	24.91	21.02		100000	30.6533	20.59	10.0633	638.543		100000	638.543
	10000000	24.92	20.89
	10000000	24.82	21.16
	1000000	27.86	20.79
	1000000	28.14	20.58
	1000000	28.05	20.87
	100000	30.85	20.51
	100000	30.7	20.65
	100000	30.41	20.61
* when a value of CT differs from the others from -1 to +1, we excluded that value.
qPCR efficiency curves - run 2
	Curve 1	Target (fv)	Ec			Average Ct - Lc	Average Ct -Ec	CtLc-CtEc	ΔCt		lc concentration	ΔCt
	100000000	19.31	20.58		100000000	19.47	20.5733	-1.10333	0.49254		100000000	0.49254
	100000000	19.7	20.63		10000000	23.3167	20.5267	2.79	5.99408		10000000	5.99408
	100000000	19.4	20.51		1000000	26.7433	20.5967	6.14667	51.6899		1000000	51.6899
	10000000	23.22	20.52		100000	29.4133	20.15	9.26333	382.109		100000	382.109
	10000000	23.22	20.31
	10000000	23.51	20.75
	1000000	26.61	20.61
	1000000	26.84	20.63
	1000000	26.78	20.55
	100000	29.52	20.18
	100000	29.2	20.1
	100000	29.52	20.17
qPCR efficiency curves - run 3
NTC	Curve 1	Target (lc)	Ec			Average Ct - fv	Average Ct -Ec	CtGv-CtEc	ΔCt		lc concentration	ΔCt
Fv	100000000	19.84	20.2		100000000	19.9467	20.03	-0.0833333	0.947917		100000000	0.947917
37.13	100000000	20	20.01		10000000	23.5767	19.8133	3.76333	11.1955		10000000	11.1955
Ec	100000000	20	19.88		1000000	27.1767	19.97	7.20667	102.067		1000000	102.067
30.46	10000000	24.17	19.86		100000	30.7133	20.5433	10.17	683.792		100000	683.792
	10000000	23.27	19.78
	10000000	23.29	19.8
	1000000	27.15	19.99
	1000000	27.28	20.05
	1000000	27.1	19.87
	100000	30.37	20.36
	100000	30.78	20.31
	100000	30.99	20.96
	Assay 1	Assay 1	Assay 2	Assay 3	Assay 4	Assay 5	Assay 1	Assay 2	Assay 3	Assay 4	Assay 5	Assay 1	Assay 2	Assay 3	Assay4	Assay5
Concentração	100000000	10000000			#REF!	#REF!	1000000			#REF!	#REF!	100000			#REF!	#REF!
Ct	0.512975	11.9121			5.99408	11.1955	106.301			51.6899	102.067	638.543			382.109	683.792
			#REF!	#REF!				#REF!	#REF!				#REF!	#REF!
			#REF!	#REF!				#REF!	#REF!				#REF!	#REF!
		Média	Desvio
		#REF!	#REF!
		#REF!	#REF!
		#REF!	#REF!
		#REF!	#REF!

## Sheet: Assays-Bacterial quantification
Cycle threshold of each assay - raw data												Bacterial quantification
qPCR - adhesion assay 1
	Curve 1	Target	Ec			Average Ct X	Average Ct -Ec	CtX-CtEc	ΔCt
	Lc	21.06	18.53		Lc	21.09	18.5967	2.49333	4.63605						Calibration curves
	Lc	21.09	18.52		Lc+Gv	21.64	18.22	3.42	8.19837						Lc	y=(1/53329660x)^(1/0.98)
	Lc	21.12	18.74		Lc+Gv	26.93	18.22	8.71	130.876						Gv	y=(1/57558537x)^(1/0.92)
	Lc+Gv	21.57	18.42		Gv	25.4967	18.06	7.43667	64.179						Gp	y=(1/10238613x)^(1/0.82)
	Lc+Gv	21.64	18.16		Lc+Gl	31.18	18.3433	12.8367	2689.02						Gs	y=(1/2442751,06x)^(1/0.78)
	Lc+Gv	21.71	18.08		Gl	26.6633	20.1333	6.53	55.5433						Gl	y=(1/1270800752x)^(1/1.03)
	Lc+Gv	26.97	18.42		Lc+Gl	27.7767	20.1333	7.64333	110.175
	Lc+Gv	26.81	18.16		Lc+Gs	21.4567	18.8033	2.65333	5.11559
	Lc+Gv	27.01	18.08		Lc+Gs	22.38	18.8433	3.53667	6.66852
	Gv	25.44	18.03		Lc+Gp	21.6067	18.5967	3.01	6.3707
	Gv	25.71	18.13		Lc+Gp	24.47	19.0667	5.40333	19.3305
	Gv	25.34	18.02		Gp	24.47	18.09	6.38	33.0167
	Lc+Gl	31.11	18.42		Gs	22.38	18.8433	3.53667	6.66852
	Lc+Gl	31.28	18.35		Lc+Gv+Gp	29.4267	17.1767	12.25	1874.36
	Lc+Gl	31.15	18.26		Lc+Gv+Gp	24.46	18.1633	6.29667	48.1162
	Gl	26.63	20.13		Lc+Gv+Gp	24.73	18.33	6.4	30.9867
	Gl	26.55	20.13		Gv+Gp	23.2067	18.1633	5.04333	22.2554
	Gl	26.81	20.14		Gv+Gp	24.075	18.1633	5.91167	23.8449						Single species assays - concentration of each bacteria calculated
	Lc+Gl	27.57	20.87		Lc+Gv+Gl	28.3133	18.4733	9.84	425.569
	Lc+Gl	27.63	20.98		Lc+Gv+Gl	24.87	18.4733	6.39667	51.1692							Concentration Lc	Concentration Gv			Concentration de Lc	Concentration Gp			Concentration Lc	Concentration Gl
	Lc+Gl	28.13	21.04		Lc+Gv+Gl	25.1467	18.4733	6.67333	60.6633			y= A.x^-B	Lc		Control -assay 1	1.60295e+07	2.95355e+06		Control -assay 1	1.60295e+07	4.97691e+06		Control -assay 1	1.60295e+07	1.39667e+07
	Lc+Gs	21.45	18.82		Gv+Gl	22.74	18.1633	4.57667	16.7015			A=	53329660		Control -assay 2	1.84805e+07	2.26e+06		Control -assay 2	1.84805e+07	4.90594e+06		Control -assay 2	1.84805e+07	5.12506e+07
	Lc+Gs	21.53	18.74		Gv+Gl	22.83	18.1633	4.66667	17.6523			B=	0.98		Control - assay 3	6.99931e+06	2.57837e+06		Control - assay 3	6.99931e+06	3.47178e+06		Control - assay 3	6.99931e+06	7.48134e+07
	Lc+Gs	21.39	18.85		Lc+Gv+Gs	28.2567	18.1633	10.0933	497.34						Competition 1	1.60295e+07	1.36134e+06		Competition 1	1.15895e+07	9.56062e+06		Competition 1	24270.3	7.183e+06
	Gs	22.21	18.71		Lc+Gv+Gs	24.2567	18.1633	6.09333	42.4587			y= A.x^-B	Gv		Competition 2	1.5149e+07	3.58095e+06		Competition 2	5.46793e+06	2.92205e+06		Competition 2	23842.5	8.52441e+06
	Gs	22.35	18.79		Lc+Gv+Gs	21.42	18.1633	3.25667	5.95987			A=	57558537		Competition 3	7.80387e+06	2.56794e+06		Competition 3	1.6063e+07	4.26767e+06		Competition 3	193774	1.48854e+07
	Gs	22.58	19.03		Gv+Gs	23.65	18.1933	5.45667	28.699			B=	0.92
	Lc+Gp	21.48	18.57		Gv+Gs	20.11	18.1933	1.91667	2.85927
	Lc+Gp	21.72	18.55		Lc+Gp+Gl	31.425	18.0733	13.3517	3691.37			y= A.x^-B	Gp
	Lc+Gp	21.62	18.67		Lc+Gp+Gl	24.2433	18.0733	6.17	27.3896			A=	10238613							Concentration Lc	Concentration Gs
	Lc+Gp	24.44	19.06		Lc+Gp+Gl	27.1433	18.0733	9.07	129.8			B=	0.82						Control -assay 1	1.60295e+07	1.35875e+07
	Lc+Gp	24.49	19.13		Gp+Gl	24.0533	18.0967	5.95667	24.4276										Control -assay 2	1.84805e+07	1.35875e+07
	Lc+Gp	24.6	19.01		Gp+Gl	22.79	18.0967	4.69333	17.9443			y= A.x^-B	Gl						Control - assay 3	6.99931e+06	3.93686e+07
	Gp	24.35	18.06		Lc+Gp+Gs	29.305	18.7867	10.5183	645.954			A=	1270800752						Competition 1	1.44977e+07	1.35875e+07
	Gp	24.44	18.05		Lc+Gp+Gs	25.36	18.7867	6.57333	34.0064			B=	1.03						Competition 2	3.9451e+06	1.35875e+07
	Gp	24.62	18.16		Lc+Gp+Gs	22.0967	18.7867	3.31	6.13667										Competition 3	7.45277e+06	6.47927e+06
	Gs	22.21	18.71		Gp+Gs	30.865	18.4567	12.4083	778.204			y= A.x^-B	Gs
	Gs	22.35	18.79		Gp+Gs	21.0333	18.7867	2.24667	3.42618			A=	2.44275e+06
	Gs	22.58	19.03		Lc+Gl+Gs	32.87	18.05	14.82	3371.66			B=	0.78
	Lc+Gv+Gp	29.78	17.39		Lc+Gl+Gs	27.4833	18.05	9.43333	176.023
	Lc+Gv+Gp	29.21	17.04		Lc+Gl+Gs	22.2067	18.05	4.15667	9.76064
	Lc+Gv+Gp	29.29	17.1		Gl+Gs	25.43	18.1967	7.23333	52.7068						Dual species combinations assays - concentration of each bacteria calculated
	Lc+Gv+Gp	24.48	18.02		Gl+Gs	21.3167	18.1967	3.12	5.52973							Concentration Lc	Concentration Gv	Concentration Gs			Concentration Lc	Concentration Gv	Concentration Gl			Concentration Lc	Concentration Gp	Concentration Gs
	Lc+Gv+Gp	29.37*	17.83												Control -assay 1	1.60295e+07	7.08376e+06	4.02389e+07		Control -assay 1	1.60295e+07	1.27591e+07	4.25034e+07		Control -assay 1	1.60295e+07	105524	3.19106e+07
	Lc+Gv+Gp	24.44	18.64												Control -assay 2	1.84805e+07	2.24519e+06	3.35195e+07		Control -assay 2	1.84805e+07	1.02308e+07	2.85309e+07		Control -assay 2	1.84805e+07	1134.17	3.76116e+07
	Lc+Gv+Gp	24.57	18.02												Control - assay 3	6.99931e+06	2.62138e+06	2.32051e+07		Control - assay 3	6.99931e+06	5.24303e+06	4.70457e+07		Control - assay 3	6.99931e+06	114892	5.54645e+07
	Lc+Gv+Gp	24.78	17,83*												Competition 1	135824	4.62779e+06	1.56926e+07		Competition 1	159235	3.77819e+06	1.28208e+07		Competition 1	104018	4.80084e+06	1.51154e+07
	Lc+Gv+Gp	24.84	18.64												Competition 2	1.51305e+06	4.15823e+06	1.85434e+07		Competition 2	56285	3.33932e+06	8.64674e+06		Competition 2	132456	871664	7.7265e+06
	Gv+Gp	23.26	18.02												Competition 3	175508	815250	5.24325e+07		Competition 3	166737	677557	6.59366e+06		Competition 3	122844	3.15151e+06	1.57294e+07
	Gv+Gp	23.16	17.83
	Gv+Gp	23.2	18.64
	Gv+Gp	23.96	18.02													Concentration Lc	Concentration Gv	Concentration Gp			Concentration Lc	Concentration Gp	Concentration Gl			Concentration Lc	Concentration Gl	Concentration Gs
	Gv+Gp	24.19	17.83												Control -assay 1	1.60295e+07	9.33894e+06	7.40157e+06		Control -assay 1	1.60295e+07	7.18684e+06	4.18318e+07		Control -assay 1	1.60295e+07	1.46959e+07	1.72745e+07
	Gv+Gp	31.18*	18.64												Control -assay 2	1.84805e+07	9.70774e+06	3.62581e+06		Control -assay 2	1.84805e+07	2.13063e+06	4.91579e+06		Control -assay 2	1.84805e+07	1.11086e+07	2.00178e+07
	Lc+Gv+Gl	28.15	18.73												Control - assay 3	6.99931e+06	1.53535e+06	2.99733e+06		Control - assay 3	6.99931e+06	4.45774e+06	1.51848e+07		Control - assay 3	6.99931e+06	1.91296e+07	3.65542e+07
	Lc+Gv+Gl	28.37	18.28												Competition 1	35076.4	4.03947e+06	5.37735e+06		Competition 1	17566.1	6.25059e+06	6.12614e+06		Competition 1	19267.4	4.55771e+06	8.33733e+06
	Lc+Gv+Gl	28.42	18.41												Competition 2	210772	4.39227e+06	2.07853e+06		Competition 2	82372.9	2.49288e+06	6.3489e+06		Competition 2	37505.5	2.99731e+06	1.09148e+07
	Lc+Gv+Gl	24.85	18.73												Competition 3	77848.1	4.9039e+06	4.8429e+06		Competition 3	39602.5	4.99305e+06	1.30152e+06		Competition 3	9726.43	1.44636e+06	4.10962e+07
	Lc+Gv+Gl	24.97	18.28
	Lc+Gv+Gl	24.79	18.41
	Lc+Gv+Gl	25.03	18.73
	Lc+Gv+Gl	25.17	18.28
	Lc+Gv+Gl	25.24	18.41
	Gv+Gl	22.81	18.02
	Gv+Gl	22.66	17.83
	Gv+Gl	22.75	18.64
	Gv+Gl	22.78	18.02
	Gv+Gl	22.66	17.83
	Gv+Gl	23.05	18.64
	Lc+Gv+Gs	28.35	18.02
	Lc+Gv+Gs	28.35	17.83
	Lc+Gv+Gs	28.07	18.64
	Lc+Gv+Gs	24.28	18.02
	Lc+Gv+Gs	24.28	17.83
	Lc+Gv+Gs	24.21	18.64
	Lc+Gv+Gs	21.44	18.02
	Lc+Gv+Gs	21.36	17.83
	Lc+Gv+Gs	21.46	18.64
	Gv+Gs	23.58	18.32
	Gv+Gs	23.76	17.62
	Gv+Gs	23.61	18.64
	Gv+Gs	20.19	18.32
	Gv+Gs	20.7	17.62
	Gv+Gs	19.44	18.64
	Lc+Gp+Gl	32.19*	18.01
	Lc+Gp+Gl	31.88	18.18
	Lc+Gp+Gl	30.97	18.03
	Lc+Gp+Gl	24.16	18.01
	Lc+Gp+Gl	24.32	18.18
	Lc+Gp+Gl	24.25	18.03
	Lc+Gp+Gl	27.32	18.01
	Lc+Gp+Gl	27.2	18.18
	Lc+Gp+Gl	26.91	18.03
	Gp+Gl	24.06	18.15
	Gp+Gl	24.05	18.14
	Gp+Gl	24.05	18
	Gp+Gl	22.63	18.15
	Gp+Gl	22.74	18.14
	Gp+Gl	23	18
	Lc+Gp+Gs	30,97*	18.66
	Lc+Gp+Gs	29.4	18.84
	Lc+Gp+Gs	29.21	18.86
	Lc+Gp+Gs	23,93*	18.66
	Lc+Gp+Gs	25.24	18.84
	Lc+Gp+Gs	25.48	18.86
	Lc+Gp+Gs	22.64	18.66
	Lc+Gp+Gs	21.93	18.84
	Lc+Gp+Gs	21.72	18.86
	Gp+Gs	31.2	18.35
	Gp+Gs	30.53	18.49
	Gp+Gs	N/A	18.53
	Gp+Gs	21.32	18.35
	Gp+Gs	21.35	18.49
	Gp+Gs	20.43	18.53
	Lc+Gl+Gs	32.81	18
	Lc+Gl+Gs	32.94	18.07
	Lc+Gl+Gs	32.86	18.08
	Lc+Gl+Gs	27.53	18
	Lc+Gl+Gs	27.53	18.07
	Lc+Gl+Gs	27.39	18.08
	Lc+Gl+Gs	22.43	18
	Lc+Gl+Gs	22.11	18.07
	Lc+Gl+Gs	22.08	18.08
	Gl+Gs	N/A	18.23
	Gl+Gs	26.23	18.17
	Gl+Gs	24.63	18.19
	Gl+Gs	21.43	18.23
	Gl+Gs	21.27	18.17
	Gl+Gs	21.25	18.19
NA: non amplified
* when a value of CT differs from the others from -1 to +1, we excluded that value.
qPCR - adhesion assay 2
	Curve 1	Target	Ec			Average Ct X	Average Ct -Ec	CtX-CtEc	ΔCt
	Lc	20.72	18.63		Lc	20.7733	18.5067	2.26667	4.03264
	Lc	20.74	18.51		Gv	26.32	18.4433	7.87667	82.0975
	Lc	20.86	18.38		Lc+Gv	22.1967	19.6133	2.58333	4.89997
	Gv	26.46	18.35		Lc+Gv	25.2767	18.1567	7.12	53.7565
	Gv	26.28	18.52		Lc+Gl	29.915	17.05	12.865	2736.3
	Gv	26.22	18.46		Gl	22.5967	18.2433	4.35333	14.5575
	Lc+Gv	22.04	19.73		Lc+Gl	25.3367	17.98	7.35667	92.362
	Lc+Gv	22.24	19.4		Lc+Gp	22.9733	18.7667	4.20667	13.3016
	Lc+Gv	22.31	19.71		Lc+Gp	25.7733	18.5967	7.17667	51.0949
	Lc+Gv	25.17	18.07		Gp	25.7167	19.4467	6.27	33.4079
	Lc+Gv	25.25	18.19		Gs	22.38	18.8433	3.53667	6.66852
	Lc+Gv	25.41	18.21		Lc+Gs	23.5067	18.78	4.72667	18.316
	Lc+Gl	31,98*	17.18		Lc+Gs	23.575	18.8033	4.77167	12.9354
	Lc+Gl	29.91	16.92		Lc+Gv+Gp	27.47	18.0767	9.39333	323.32
	Lc+Gl	29.92	17.05		Lc+Gv+Gp	25.1533	18.0767	7.07667	44.5488
	Gl	22.68	18.95		Lc+Gv+Gp	24.915	18.0667	6.84833	67.5587
	Gl	22.5	18.73		Gv+Gp	23.2533	17.5367	5.71667	21.4764
	Gl	22.61	18.77		Gv+Gp	23.0767	16.97	6.10667	42.8084
	Lc+Gl	25.38	18.15		Lc+Gv+Gl	29.44	17.9433	11.4967	1179.19
	Lc+Gl	25.36	18.03		Lc+Gv+Gl	25.49	17.9433	7.54667	57.325
	Lc+Gl	25.27	17.76		Lc+Gv+Gl	26.1733	17.9433	8.23	91.0164
	Lc+Gp	23.03	18.6		Gv+Gl	23.8067	18.18	5.62667	20.464
	Lc+Gp	22.99	18.78		Gv+Gl	24.1667	18.18	5.98667	26.6135
	Lc+Gp	22.9	18.92		Lc+Gv+Gs	24.27	18.0167	6.25333	46.8505
	Lc+Gp	25.73	18.57		Lc+Gv+Gs	20.7067	18.0167	2.69	5.23229
	Lc+Gp	25.75	18.55		Lc+Gv+Gs	20.7067	18.0167	2.69	4.36862
	Lc+Gp	25.84	18.67		Gv+Gs	25.335	18.16	7.175	82.5956
	Gp	25.91	19.48		Gv+Gs	20.3367	18.16	2.17667	3.29721
	Gp	25.6	19.46		Lc+Gp+Gl	27.1433	16.2533	10.89	811.895
	Gp	25.64	19.4		Lc+Gp+Gl	25.225	17.65	7.575	58.203
	Gs	22.21	18.71		Lc+Gp+Gl	25.5	17.65	7.85	125.112
	Gs	22.35	18.79		Gp+Gl	25.465	17.65	7.815	66.201
	Gs	22.58	19.03		Gp+Gl	25.4833	17.205	8.27833	162.831
	Lc+Gs	23.35	18.8		Lc+Gp+Gs	27.4667	17.3333	10.1333	509.73
	Lc+Gs	23.42	18.51		Lc+Gp+Gs	25.34	17.3333	8.00667	137.77
	Lc+Gs	23.75	19.03		Lc+Gp+Gs	21.1333	17.3333	3.8	10.3574
	Lc+Gs	22.05*	18.82		Gp+Gs	34.48	17.6167	16.8633	32018.9
	Lc+Gs	23.84	18.74		Gp+Gs	19.6133	17.82	1.79333	3.01389
	Lc+Gs	23.31	18.85		Lc+Gl+Gs	29.9733	17.83	12.1433	1755.32
	Lc+Gv+Gp	27.12	18.16		Lc+Gl+Gs	26.9367	17.83	9.10667	271.047
	Lc+Gv+Gp	27.69	17.95		Lc+Gl+Gs	21.6033	17.83	3.77333	7.91093
	Lc+Gv+Gp	27.6	18.12		Gl+Gs	24.6633	17.75	6.91333	70.3149
	Lc+Gv+Gp	25.28	18.16		Gl+Gs	20.7233	17.75	2.97333	4.92918
	Lc+Gv+Gp	25.07	17.95
	Lc+Gv+Gp	25.11	18.12
	Lc+Gv+Gp	26.12	18.16
	Lc+Gv+Gp	26.31	17.95
	Lc+Gv+Gp	N/A	18.12
	Gv+Gp	23.52	18.13
	Gv+Gp	23.46	18.05
	Gv+Gp	23.47	18.22
	Gv+Gp	22.83	16.34
	Gv+Gp	22.93	16.35
	Gv+Gp	22.86	16.82
	Lc+Gv+Gl	29.61	17.9
	Lc+Gv+Gl	29.33	17.97
	Lc+Gv+Gl	29.38	17.96
	Lc+Gv+Gl	25.41	17.9
	Lc+Gv+Gl	25.59	17.97
	Lc+Gv+Gl	25.47	17.96
	Lc+Gv+Gl	26.18	17.9
	Lc+Gv+Gl	26.29	17.97
	Lc+Gv+Gl	26.05	17.96
	Gv+Gl	23.6	18.09
	Gv+Gl	23.87	18.15
	Gv+Gl	23.95	18.3
	Gv+Gl	24.09	18.09
	Gv+Gl	24.22	18.15
	Gv+Gl	24.19	18.3
	Lc+Gv+Gs	24.26	18.03
	Lc+Gv+Gs	24.32	17.99
	Lc+Gv+Gs	24.23	18.03
	Lc+Gv+Gs	20.9	18.03
	Lc+Gv+Gs	20.17	17.99
	Lc+Gv+Gs	21.05	18.03
	Lc+Gv+Gs	20.9	18.03
	Lc+Gv+Gs	20.17	17.99
	Lc+Gv+Gs	21.05	18.03
	Gv+Gs	25.55	18.14
	Gv+Gs	N/A	18.17
	Gv+Gs	25.12	18.17
	Gv+Gs	20.06	18.14
	Gv+Gs	20.42	18.17
	Gv+Gs	20.53	18.17
	Lc+Gp+Gl	27.26	16.24
	Lc+Gp+Gl	27.12	15.82
	Lc+Gp+Gl	27.05	16.7
	Lc+Gp+Gl	N/A	N/A
	Lc+Gp+Gl	25.03	17.71
	Lc+Gp+Gl	25.42	17.59
	Lc+Gp+Gl	25.57	N/A
	Lc+Gp+Gl	25.53	17.71
	Lc+Gp+Gl	25.4	17.59
	Gp+Gl	N/A	17.97*
	Gp+Gl	27.22	20.1
	Gp+Gl	27.01	20.7
	Gp+Gl	22.22	17.97
	Gp+Gl	22.34	18.1
	Gp+Gl	22.54	18.13
	Lc+Gp+Gs	27.47	17.1
	Lc+Gp+Gs	27.5	17.57
	Lc+Gp+Gs	27.43	17.33
	Lc+Gp+Gs	35.63*	17.1
	Lc+Gp+Gs	25.47	17.57
	Lc+Gp+Gs	25.21	17.33
	Lc+Gp+Gs	21.26	17.1
	Lc+Gp+Gs	21.11	17.57
	Lc+Gp+Gs	21.03	17.33
	Gp+Gs	34.48	17.6
	Gp+Gs	N/A	17.92
	Gp+Gs	36.33*	17.94
	Gp+Gs	19.67	17.6
	Gp+Gs	19.51	17.92
	Gp+Gs	19.66	17.94
	Lc+Gl+Gs	29.92	17.69
	Lc+Gl+Gs	30.02	17.92
	Lc+Gl+Gs	29.98	17.88
	Lc+Gl+Gs	26.82	17.69
	Lc+Gl+Gs	27.02	17.92
	Lc+Gl+Gs	26.97	17.88
	Lc+Gl+Gs	21.74	17.69
	Lc+Gl+Gs	21.65	17.92
	Lc+Gl+Gs	21.42	17.88
	Gl+Gs	24.67	17.56
	Gl+Gs	24.7	17.56
	Gl+Gs	24.62	18.13
	Gl+Gs	20.68	17.56
	Gl+Gs	20.69	17.56
	Gl+Gs	20.8	18.13
qPCR - adhesion assay 3
NTC	Curve 1	Target	Ec			Average Ct - X	Average Ct -Ec	CtX-CtEc	ΔCt
lj	Lc	22.84	19.12		Lc	22.8967	19.0833	3.81333	10.4427
na	Lc	22.92	18.98		Gv	26.4033	18.7433	7.66	72.7229
Ec	Lc	22.93	19.15		Lc+Gv	23.3467	19.7067	3.64	9.38653
31.17	Gv	26.34	18.8		Lc+Gv	25.53	17.8633	7.66667	72.9948
	Gv	26.57	18.75		Lc+Gl	26.8333	16.36	10.4733	351.09
	Gv	26.3	18.68		Gl	23.09	19.37	3.72	9.86004
	Lc+Gv	23.35	19.68		Lc+Gl	25.22	18.7967	6.42333	52.0155
	Lc+Gv	23.27	19.66		Lc+Gp	20.69	18.2	2.49	4.62655
	Lc+Gv	23.42	19.78		Lc+Gp	25.3767	18.7667	6.61	37.4528
	Lc+Gv	25.45	18.12		Gp	25.41	18.6333	6.77667	44.3596
	Lc+Gv	25.65	17.8		Gs	20.83	18.84	1.99	2.90845
	Lc+Gv	25.49	17.67		Lc+Gs	24.1	20.3867	3.71333	9.81969
	Lc+Gl	26.75	16.31		Lc+Gs	23.3933	18.78	4.61333	11.882
	Lc+Gl	26.92	16.3		Lc+Gv+Gp	28.7533	17.7733	10.98	858.115
	Lc+Gl	26.83	16.47		Lc+Gv+Gp	23.78	17.7733	6.00667	40.2542
	Gl	23.43	19.38		Lc+Gv+Gp	24.3333	17.7733	6.56	33.764
	Gl	22.95	19.24		Gv+Gp	24.9867	17.2433	7.74333	117.166
	Gl	22.89	19.49		Gv+Gp	24.5367	17.2433	7.29333	50.0401
	Lc+Gl	25.12	18.89		Lc+Gv+Gl	27.2833	17.5167	9.76667	406.797
	Lc+Gl	25.21	18.59		Lc+Gv+Gl	26.4833	17.5167	8.96667	248.679
	Lc+Gl	25.33	18.91		Lc+Gv+Gl	25.3033	17.5167	7.78667	120.331
	Lc+Gp	20.83	18.14		Gv+Gl	23.23	17.3233	5.90667	37.8525
	Lc+Gp	20.52	18.12		Gv+Gl	21.82	17.3233	4.49667	15.8995
	Lc+Gp	20.72	18.34		Lc+Gv+Gs	26.585	16.9	9.685	386.864
	Lc+Gp	25.38	18.6		Lc+Gv+Gs	25.59	16.9	8.69	209.76
	Lc+Gp	25.43	18.78		Lc+Gv+Gs	18.44	16.9	1.54	2.3259
	Lc+Gp	25.32	18.92		Gv+Gs	23.4367	16.4933	6.94333	71.6246
	Gp	25.38	18.62		Gv+Gs	19.1933	16.4933	2.7	4.39263
	Gp	25.41	18.53		Lc+Gp+Gl	29.2467	17.19	12.0567	1664.18
	Gp	25.44	18.75		Lc+Gp+Gl	23.7033	17.19	6.51333	32.9292
	Gs	20.76	18.98		Lc+Gp+Gl	27.6933	17.19	10.5033	640.02
	Gs	20.75	18.77		Gp+Gl	23.7167	17.03	6.68667	36.1383
	Gs	20.98	18.77		Gp+Gl	23.42	17.03	6.39	50.9598
	Lc+Gs	23.84	20.5		Lc+Gp+Gs	27.47	17.2167	10.2533	548.783
	Lc+Gs	23.88	20.34		Lc+Gp+Gs	24.4333	17.2167	7.21667	48.0237
	Lc+Gs	24.58	20.32		Lc+Gp+Gs	20.47	17.2167	3.25333	5.94899
	Lc+Gs	23.37	18.8		Gp+Gs	29.305	17.0267	12.2783	725.778
	Lc+Gs	23.29	18.51		Gp+Gs	18.4867	17.0267	1.46	2.22611
	Lc+Gs	23.52	19.03		Lc+Gl+Gs	31.9667	17.6733	14.2933	6588.32
	Lc+Gv+Gp	28.53	17.44		Lc+Gl+Gs	28	17.6733	10.3267	574.108
	Lc+Gv+Gp	28.84	18.17		Lc+Gl+Gs	19.56	17.6733	1.88667	2.81264
	Lc+Gv+Gp	28.89	17.71		Gl+Gs	23.32	17.3167	6.00333	40.1718
	Lc+Gv+Gp	23.64	17.44		Gl+Gs	19.37	17.3167	2.05333	3.08168
	Lc+Gv+Gp	24	18.17
	Lc+Gv+Gp	23.7	17.71
	Lc+Gv+Gp	24.27	17.44
	Lc+Gv+Gp	24.32	18.17
	Lc+Gv+Gp	24.41	17.71
	Gv+Gp	25.06	17.64
	Gv+Gp	25.03	17.05
	Gv+Gp	24.87	17.04
	Gv+Gp	24.77	17.64
	Gv+Gp	24.5	17.05
	Gv+Gp	24.34	17.04
	Lc+Gv+Gl	27.47	17.5
	Lc+Gv+Gl	27.15	17.34
	Lc+Gv+Gl	27.23	17.71
	Lc+Gv+Gl	26.33	17.5
	Lc+Gv+Gl	26.58	17.34
	Lc+Gv+Gl	26.54	17.71
	Lc+Gv+Gl	25.26	17.5
	Lc+Gv+Gl	25.39	17.34
	Lc+Gv+Gl	25.26	17.71
	Gv+Gl	23.16	17.72
	Gv+Gl	23.13	17.09
	Gv+Gl	23.4	17.16
	Gv+Gl	21.81	17.72
	Gv+Gl	21.92	17.09
	Gv+Gl	21.73	17.16
	Lc+Gv+Gs	N/A	17.06
	Lc+Gv+Gs	26.15	16.64
	Lc+Gv+Gs	27.02	17
	Lc+Gv+Gs	25.89	17.06
	Lc+Gv+Gs	25.79	16.64
	Lc+Gv+Gs	25.09	17
	Lc+Gv+Gs	14.54*	17.06
	Lc+Gv+Gs	18.31	16.64
	Lc+Gv+Gs	18.57	17
	Gv+Gs	23.77	16.42
	Gv+Gs	23.63	16.65
	Gv+Gs	22.91	16.41
	Gv+Gs	19.11	16.42
	Gv+Gs	19.26	16.65
	Gv+Gs	19.21	16.41
	Lc+Gp+Gl	29.41	N/A
	Lc+Gp+Gl	29	17.2
	Lc+Gp+Gl	29.33	17.18
	Lc+Gp+Gl	23.89	N/A
	Lc+Gp+Gl	23.63	17.2
	Lc+Gp+Gl	23.59	17.18
	Lc+Gp+Gl	27.55	N/A
	Lc+Gp+Gl	28.02	17.2
	Lc+Gp+Gl	27.51	17.18
	Gp+Gl	23.57	17.12
	Gp+Gl	23.63	16.92
	Gp+Gl	23.95	17.05
	Gp+Gl	23.26	17.12
	Gp+Gl	23.56	16.92
	Gp+Gl	23.44	17.05
	Lc+Gp+Gs	27.1	17.66
	Lc+Gp+Gs	28.09	17.08
	Lc+Gp+Gs	27.22	16.91
	Lc+Gp+Gs	24.73	17.66
	Lc+Gp+Gs	24.34	17.08
	Lc+Gp+Gs	24.23	16.91
	Lc+Gp+Gs	20.04	17.66
	Lc+Gp+Gs	20.9	17.08
	Lc+Gp+Gs	14,63*	16.91
	Gp+Gs	29.11	17.03
	Gp+Gs	29.5	17
	Gp+Gs	26.65*	17.05
	Gp+Gs	18.62	17.03
	Gp+Gs	18.03	17
	Gp+Gs	18.81	17.05
	Lc+Gl+Gs	31.45	17.7
	Lc+Gl+Gs	32.35	17.71
	Lc+Gl+Gs	32.1	17.61
	Lc+Gl+Gs	28.18	17.7
	Lc+Gl+Gs	28.05	17.71
	Lc+Gl+Gs	27.77	17.61
	Lc+Gl+Gs	17.94	17.7
	Lc+Gl+Gs	20.45	17.71
	Lc+Gl+Gs	20.29	17.61
	Gl+Gs	23.1	17.25
	Gl+Gs	23.51	17.35
	Gl+Gs	23.35	17.35
	Gl+Gs	19.09	17.25
	Gl+Gs	19.62	17.35
	Gl+Gs	19.4	17.35
